# Supplementary material for: Protective effects of EGCG on acrolein-induced Caenorhabditis elegans and its mechanism of life extension
Source: Royal Society of Chemistry journal article supplement (doi:10.1039/d3fo05394f), 2024-01-01
Supplement: d3fo05394f1.pdf [file d3fo05394f1.pdf]

## Supplementary material

**Figure S1.** Dosing methods of different groups.

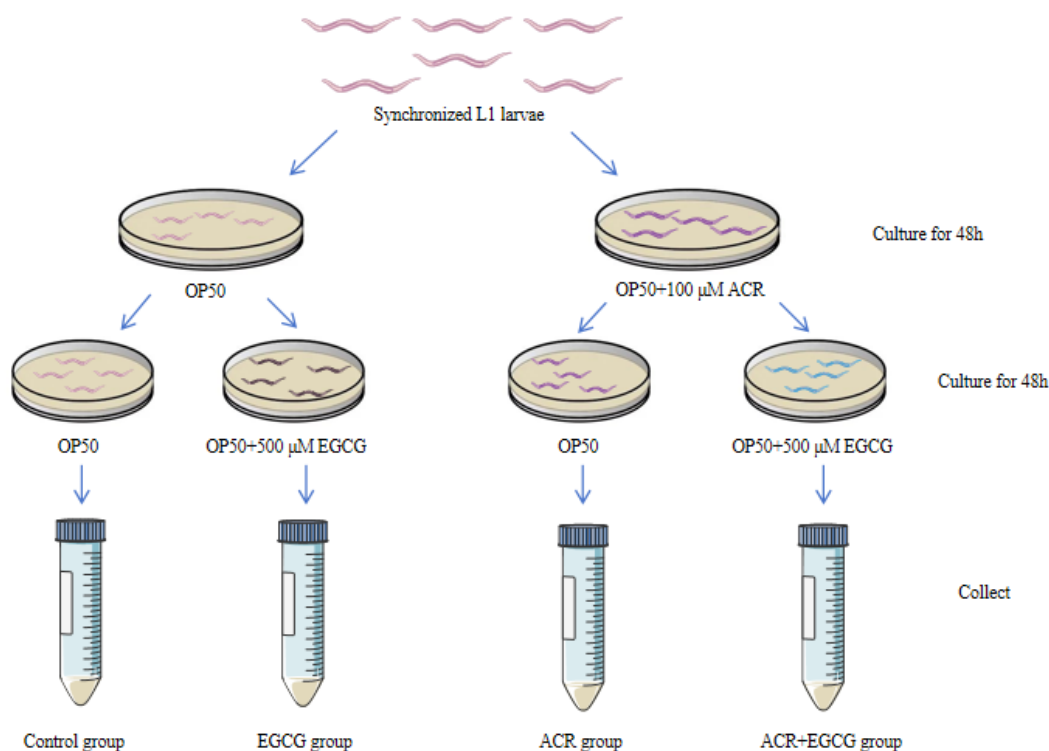

**Table S1.** Primer sequences used for RT-qPCR

| Gene             | Direction | Primer sequences         |
|------------------|-----------|--------------------------|
| <i>Actin-1</i>   | Forward   | TCTGGATCGGAGGATCTATTCT   |
|                  | Reverse   | AAGCACTTTCGGTGAACAATC    |
| <i>daf-2</i>     | Forward   | TGAAAGCGAAGCAGCGAGAAGG   |
|                  | Reverse   | CGTCCGAACTTCCGCATCACTC   |
| <i>daf-16</i>    | Forward   | AATTCCTCTCAACAGCAGCAGACC |
|                  | Reverse   | ACCACCGCCTTGTGACAGATTAAG |
| <i>skn-1</i>     | Forward   | GGTCTCCGTTGGCGTGATGATC   |
|                  | Reverse   | CTGGTGGATGCTCGGTGAGTATTG |
| <i>gst-24</i>    | Forward   | GCTCCCATTCCTCTCAGTCG     |
|                  | Reverse   | TGATGAGTTGGCGTAGTGGG     |
| <i>hsp-70</i>    | Forward   | AGCCCGTTGTTGAGGTTGAAGTG  |
|                  | Reverse   | CAGGCACAGTAATGACAGCATCCC |
| <i>hsp-16.2</i>  | Forward   | CTGCAGAATCTCTCCATCTGAGTC |
|                  | Reverse   | AGATTCTGAAGCAACTGCACC    |
| <i>hsp-16.1</i>  | Forward   | GGCTCAGATGGAACGTCAA      |
|                  | Reverse   | TGGCAAACTTTTGATCATTGTTA  |
| <i>hsp-16.11</i> | Forward   | TGTTGATGTTGGTGCAGTTGCT   |

|              |         |                          |
|--------------|---------|--------------------------|
|              | Reverse | GGGCGCTTGCTGAATTGGAA     |
| <i>age-1</i> | Forward | TCCATCTGTGGGCTCCTGAACC   |
|              | Reverse | CGCTGCGTTGGTGCCTATCC     |
| <i>fat-5</i> | Forward | GCCCTCTTCCGTTACTGCTTCAC  |
|              | Reverse | CTTCTCCGACTGCCGCAATAGATG |
| <i>fat-6</i> | Forward | TCGGAGAGGGAGGTCACAACCTC  |
|              | Reverse | CGGTCGTAGACAAGTCCAAGAGC  |

---
